# Supplementary material
Source: Springer Nature journal article supplement (https://www.springermedizin.de/resource/supplementary/13023_2008_136_MOESM4_ESM.pdf/9641750)

**Fibrous raphe**

**Septoparietal  
trabeculations**

**Aortic-tricuspid  
continuity**

**Septomarginal trabeculation**

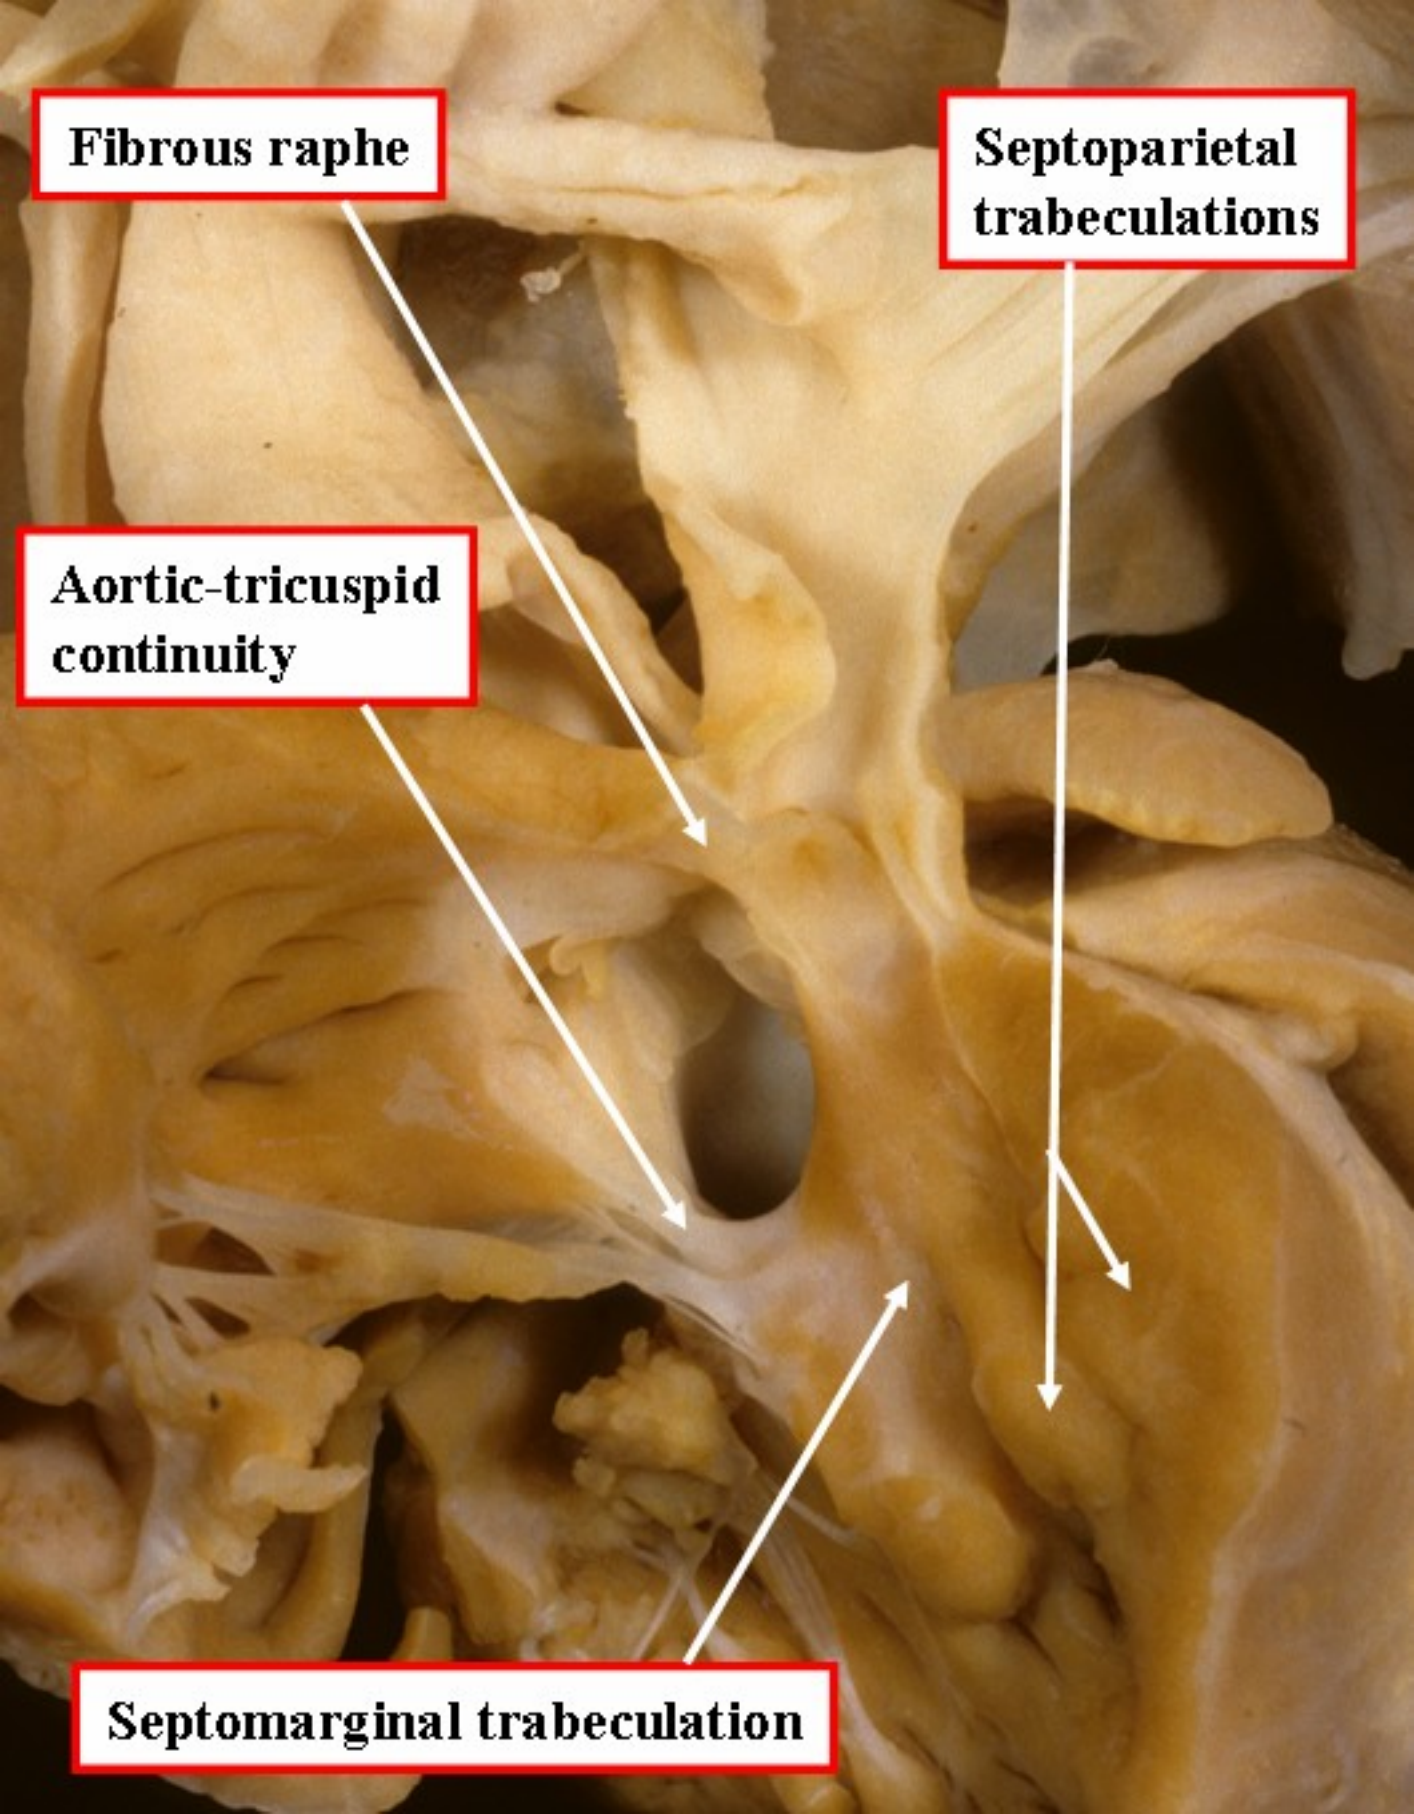

Supplement: MOESM4 [file 9641750]
